# Supplementary figures and images for: Exploring the Osteogenic Potential of Zinc-Doped Magnesium Phosphate Cement (ZMPC): A Novel Material for Orthopedic Bone Defect Repair
Source: MDPI journal article supplement (doi:10.3390/biomedicines12020344), 2024-02-01

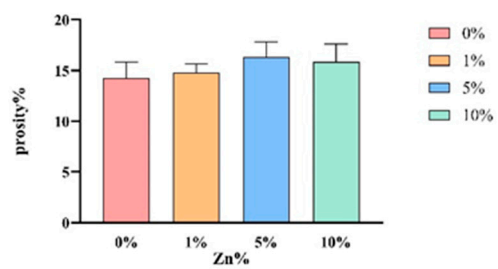

**Figure S1.** The porosity of the materials.

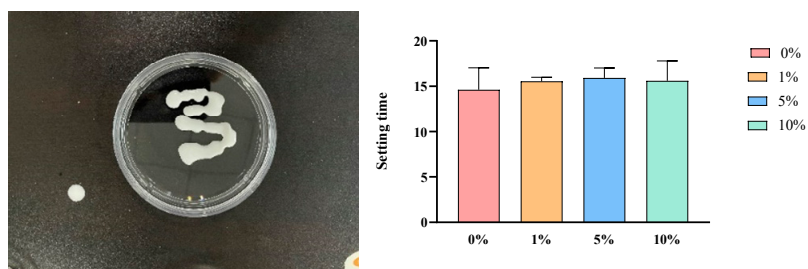

**Figure S2.** The injectability of the materials.

Supplement: s1 [file s1]
